# Supplementary material for: Positive and Negative Contribution from Lead–Oxygen Groups and Halogen Atoms to Birefringence: A First Principles Investigation
Source: MDPI journal article supplement (doi:10.3390/nano13233037), 2023-11-28
Supplement: s1 [file s1]

# Positive and Negative Contribution from Lead–Oxygen Groups and Halogen Atoms to Birefringence: A First Principles Investigation

Can Deng <sup>1,†</sup>, Jialong Wang <sup>1,†</sup>, Mei Hu <sup>1</sup>, Xiuhua Cui <sup>1,\*</sup>, Haiming Duan <sup>1</sup>, Peng Li <sup>1,\*</sup> and Ming-Hsien Lee <sup>2</sup>

<sup>1</sup> Xinjiang Key Laboratory of Solid State Physics and Devices, School of Physical Science and Technology, Xinjiang University, 777 Huarui Street, Urumqi 830017, China; dc202407@163.com (D.C.); 107552200765@stu.xju.edu.cn (J.W.); humei09292022@163.com (M.H.); dhm@xju.edu.cn (H.D.)  
<sup>2</sup> Department of Physics, Tamkang University, New Taipei City 25137, China; mhslee@mail.tku.edu.tw  
\* Correspondence: xjcxh0991@xju.edu.cn (X.C.); lip@xju.edu.cn (P.L.)  
† These authors contributed equally to this work.

Table S1. The obtained parameters of Pb<sub>3</sub>O<sub>2</sub>X<sub>2</sub> unit cell.

| Crystal                                        |               | a         | b        | c        |                                                 |
|------------------------------------------------|---------------|-----------|----------|----------|-------------------------------------------------|
| Pb <sub>3</sub> O <sub>2</sub> Cl <sub>2</sub> | measured      | 11.81 (Å) | 5.78 (Å) | 9.48 (Å) | $\alpha = 90.00^\circ$                          |
|                                                | DFT-optimized | 11.91 (Å) | 5.87 (Å) | 9.58 (Å) | $\beta = 90.00^\circ$<br>$\gamma = 90.00^\circ$ |
| Pb <sub>3</sub> O <sub>2</sub> Br <sub>2</sub> | measured      | 12.24 (Å) | 5.87 (Å) | 9.80 (Å) | $\alpha = 90.00^\circ$                          |
|                                                | DFT-optimized | 12.31 (Å) | 5.93 (Å) | 9.80 (Å) | $\beta = 90.00^\circ$<br>$\gamma = 90.00^\circ$ |
| Pb <sub>3</sub> O <sub>2</sub> Br <sub>2</sub> | measured      | 17.86 (Å) | 5.95 (Å) | 7.49 (Å) | $\alpha = 90.00^\circ$                          |
|                                                | DFT-optimized | 17.95 (Å) | 5.98 (Å) | 7.55 (Å) | $\beta = 90.00^\circ$<br>$\gamma = 90.00^\circ$ |

Table S2. The obtained parameters of Pb<sub>3</sub>O<sub>2</sub>Cl<sub>2</sub> atomic coordinates.

| Atom | X                  | Y                  | Z                  |
|------|--------------------|--------------------|--------------------|
| Pb1  | 0.4173156502772774 | 0.2500000000000000 | 0.4199853281517627 |
| Pb2  | 0.0826843497227226 | 0.7500000000000000 | 0.9199853281517626 |
| Pb3  | 0.5826843497227225 | 0.7500000000000000 | 0.5800146718482374 |
| Pb4  | 0.9173156502772775 | 0.2500000000000000 | 0.0800146718482373 |
| Pb5  | 0.7177606125402565 | 0.2500000000000000 | 0.3625412641039831 |
| Pb6  | 0.7822393874597435 | 0.7500000000000000 | 0.8625412641039827 |
| Pb7  | 0.2822393874597435 | 0.7500000000000000 | 0.6374587358960173 |
| Pb8  | 0.2177606125402565 | 0.2500000000000000 | 0.1374587358960170 |
| Pb9  | 0.4403624911090035 | 0.2500000000000000 | 0.8007650891486422 |
| Pb10 | 0.0596375088909964 | 0.7500000000000000 | 0.3007650891486421 |
| Pb11 | 0.5596375088909965 | 0.7500000000000000 | 0.1992349108513579 |
| Pb12 | 0.9403624911090035 | 0.2500000000000000 | 0.6992349108513578 |
| O1   | 0.5784517083430861 | 0.9953405670090483 | 0.3838724514552975 |
| O2   | 0.9215482916569139 | 0.4953405670090480 | 0.8838724514552977 |
| O3   | 0.9215482916569139 | 0.0046594329909519 | 0.8838724514552977 |
| O4   | 0.4215482916569139 | 0.4953405670090480 | 0.6161275485447023 |
| O5   | 0.4215482916569139 | 0.0046594329909519 | 0.6161275485447023 |
| O6   | 0.0784517083430861 | 0.5046594329909517 | 0.1161275485447024 |
| O7   | 0.0784517083430861 | 0.9953405670090483 | 0.1161275485447024 |
| O8   | 0.5784517083430861 | 0.5046594329909517 | 0.3838724514552975 |
| Cl1  | 0.6919474312753680 | 0.2500000000000000 | 0.6892437420777858 |
| Cl2  | 0.8080525687246320 | 0.7500000000000000 | 0.1892437420777857 |
| Cl3  | 0.3080525687246320 | 0.7500000000000000 | 0.3107562579222143 |
| Cl4  | 0.1919474312753681 | 0.2500000000000000 | 0.8107562579222142 |
| Cl5  | 0.6325238645129688 | 0.2500000000000000 | 0.0766019771799739 |
| Cl6  | 0.8674761354870312 | 0.7500000000000000 | 0.5766019771799735 |
| Cl7  | 0.3674761354870313 | 0.7500000000000000 | 0.9233980228200265 |
| Cl8  | 0.1325238645129686 | 0.2500000000000000 | 0.4233980228200260 |

**Table S3.** The obtained parameters of Pb<sub>3</sub>O<sub>2</sub>Br<sub>2</sub> atomic coordinates.

| Atom | X                  | Y                  | Z                  |
|------|--------------------|--------------------|--------------------|
| Pb1  | 0.4202179399913980 | 0.2500000000000000 | 0.4236458691973263 |
| Pb2  | 0.0797820600086021 | 0.7500000000000000 | 0.9236458691973263 |
| Pb3  | 0.5797820600086023 | 0.7500000000000000 | 0.5763541308026737 |
| Pb4  | 0.9202179399913977 | 0.2500000000000000 | 0.0763541308026738 |
| Pb5  | 0.7114980490723395 | 0.2500000000000000 | 0.3629744891064018 |
| Pb6  | 0.7885019509276605 | 0.7500000000000000 | 0.8629744891064016 |
| Pb7  | 0.2885019509276606 | 0.7500000000000000 | 0.6370255108935984 |
| Pb8  | 0.2114980490723394 | 0.2500000000000000 | 0.1370255108935983 |
| Pb9  | 0.4433200753819853 | 0.2500000000000000 | 0.7922096347158220 |
| Pb10 | 0.0566799246180148 | 0.7500000000000000 | 0.2922096347158223 |
| Pb11 | 0.5566799246180149 | 0.7500000000000000 | 0.2077903652841779 |
| Pb12 | 0.9433200753819851 | 0.2500000000000000 | 0.7077903652841780 |
| O1   | 0.5763138769544298 | 0.9964180328279307 | 0.3864718997087028 |
| O2   | 0.9236861230455702 | 0.4964180328279306 | 0.8864718997087031 |
| O3   | 0.9236861230455702 | 0.0035819671720693 | 0.8864718997087031 |
| O4   | 0.4236861230455703 | 0.4964180328279306 | 0.6135281002912969 |
| O5   | 0.4236861230455703 | 0.0035819671720693 | 0.6135281002912969 |
| O6   | 0.0763138769544297 | 0.5035819671720693 | 0.1135281002912972 |
| O7   | 0.0763138769544297 | 0.9964180328279307 | 0.1135281002912972 |
| O8   | 0.5763138769544298 | 0.5035819671720693 | 0.3864718997087028 |
| Br1  | 0.6902822106419052 | 0.2500000000000000 | 0.6938209252107238 |
| Br2  | 0.8097177893580948 | 0.7500000000000000 | 0.1938209252107237 |
| Br3  | 0.3097177893580951 | 0.7500000000000000 | 0.3061790747892763 |
| Br4  | 0.1902822106419050 | 0.2500000000000000 | 0.8061790747892762 |
| Br5  | 0.6294465551676828 | 0.2500000000000000 | 0.0713850082791665 |
| Br6  | 0.8705534448323172 | 0.7500000000000000 | 0.5713850082791665 |
| Br7  | 0.3705534448323172 | 0.7500000000000000 | 0.9286149917208335 |
| Br8  | 0.1294465551676828 | 0.2500000000000000 | 0.4286149917208334 |

**Table S4.** The obtained parameters of Pb<sub>3</sub>O<sub>2</sub>I<sub>2</sub> atomic coordinates.

| Atom | X                  | Y                   | Z                  |
|------|--------------------|---------------------|--------------------|
| Pb1  | 0.0279754050345063 | 0.2500000000000000  | 0.1505510721806704 |
| Pb2  | 0.4720245949654938 | 0.7500000000000000  | 0.6505510721806704 |
| Pb3  | 0.9720245949654936 | 0.7500000000000000  | 0.8494489278193296 |
| Pb4  | 0.5279754050345064 | 0.2500000000000000  | 0.3494489278193295 |
| Pb5  | 0.3380544331895737 | 0.2500000000000000  | 0.5261585322581450 |
| Pb6  | 0.1619455668104262 | 0.7500000000000000  | 0.0261585322581448 |
| Pb7  | 0.6619455668104262 | 0.7500000000000000  | 0.4738414677418551 |
| Pb8  | 0.8380544331895738 | 0.2500000000000000  | 0.9738414677418550 |
| Pb9  | 0.6073308692510272 | 0.2500000000000000  | 0.7921873739057215 |
| Pb10 | 0.8926691307489728 | 0.7500000000000000  | 0.2921873739057216 |
| Pb11 | 0.3926691307489729 | 0.7500000000000000  | 0.2078126260942784 |
| Pb12 | 0.1073308692510272 | 0.2500000000000000  | 0.7078126260942785 |
| I1   | 0.2411181127595374 | 0.2500000000000000  | 0.1716851851803514 |
| I2   | 0.2588818872404626 | 0.7500000000000000  | 0.6716851851803514 |
| I3   | 0.7588818872404627 | 0.7500000000000000  | 0.8283148148196486 |
| I4   | 0.7411181127595373 | 0.2500000000000000  | 0.3283148148196487 |
| I5   | 0.4347135857050545 | 0.2500000000000000  | 0.9083721835325103 |
| I6   | 0.0652864142949454 | 0.7500000000000000  | 0.4083721835325101 |
| I7   | 0.5652864142949452 | 0.7500000000000000  | 0.0916278164674898 |
| I8   | 0.9347135857050548 | 0.2500000000000000  | 0.5916278164674897 |
| O1   | 0.4248982250069957 | 0.0001581549454682  | 0.4177248966428499 |
| O2   | 0.0751017749930043 | 0.5001581549454681  | 0.9177248966428500 |
| O3   | 0.0751017749930043 | -0.0001581549454681 | 0.9177248966428500 |
| O4   | 0.5751017749930045 | 0.5001581549454681  | 0.5822751033571500 |
| O5   | 0.5751017749930045 | -0.0001581549454681 | 0.5822751033571500 |
| O6   | 0.9248982250069955 | 0.4998418450545317  | 0.0822751033571502 |
| O7   | 0.9248982250069955 | 0.0001581549454682  | 0.0822751033571502 |
| O8   | 0.4248982250069957 | 0.4998418450545317  | 0.4177248966428499 |

**Table S5.** The obtained static dielectric matrix.

| Crystal                                          | X        | Y        | Z        |
|--------------------------------------------------|----------|----------|----------|
| <b>Pb<sub>3</sub>O<sub>2</sub>Cl<sub>2</sub></b> | 5.10792  | 0        | 0        |
|                                                  | 0        | 5.122361 | 0        |
|                                                  | 0        | 0        | 4.996154 |
| <b>Pb<sub>3</sub>O<sub>2</sub>Br<sub>2</sub></b> | 5.697997 | 0        | 0        |
|                                                  | 0        | 5.623431 | 0        |
|                                                  | 0        | 0        | 5.453133 |
| <b>Pb<sub>3</sub>O<sub>2</sub>I<sub>2</sub></b>  | 6.322345 | 0        | 0        |
|                                                  | 0        | 6.448983 | 0        |
|                                                  | 0        | 0        | 6.171130 |

**Table S6.** The obtained Born effective charges of Pb<sub>3</sub>O<sub>2</sub>Cl<sub>2</sub>.

| Crystal                                          | atom | $q_{xx}$ | $q_{yy}$ | $q_{zz}$ |
|--------------------------------------------------|------|----------|----------|----------|
| <b>Pb<sub>3</sub>O<sub>2</sub>Cl<sub>2</sub></b> | O1   | -2.11584 | -0.04772 | 0.22352  |
|                                                  |      | -0.41283 | -3.28532 | -0.13238 |
|                                                  |      | 0.39632  | 0.10131  | -2.27909 |
|                                                  | O2   | -2.11584 | 0.04772  | -0.22352 |
|                                                  |      | 0.41283  | -3.28532 | -0.13238 |
|                                                  |      | -0.39632 | 0.10131  | -2.27909 |
|                                                  | O3   | -2.11584 | -0.04772 | -0.22352 |
|                                                  |      | -0.41283 | -3.28532 | 0.13238  |
|                                                  |      | -0.39632 | -0.10131 | -2.27909 |
|                                                  | O4   | -2.11584 | 0.04772  | 0.22352  |
|                                                  |      | 0.41283  | -3.28532 | 0.13238  |
|                                                  |      | 0.39632  | -0.10131 | -2.27909 |
|                                                  | Cl1  | -2.53999 | 0        | -0.0095  |
|                                                  |      | 0        | -1.61943 | 0        |
|                                                  |      | -0.15136 | 0        | -1.6015  |
|                                                  | Cl2  | -2.53999 | 0        | 0.0095   |
|                                                  |      | 0        | -1.61943 | 0        |
|                                                  |      | 0.15136  | 0        | -1.6015  |
|                                                  | Cl3  | -1.49253 | 0        | -0.169   |
|                                                  |      | 0        | -1.75796 | 0        |
|                                                  |      | -0.25634 | 0        | -2.03922 |
|                                                  | Cl4  | -1.49253 | 0        | 0.169    |
|                                                  |      | 0        | -1.75796 | 0        |
|                                                  |      | 0.25634  | 0        | -2.03922 |
|                                                  | Pb1  | 2.89843  | 0        | -0.2662  |
|                                                  |      | 0        | 3.54836  | 0        |
|                                                  |      | -0.21271 | 0        | 2.46643  |
|                                                  | Pb2  | 2.89843  | 0        | 0.2662   |
|                                                  |      | 0        | 3.54836  | 0        |
|                                                  |      | 0.21271  | 0        | 2.46643  |
|                                                  | Pb3  | 2.56882  | 0        | -0.15219 |
|                                                  |      | 0        | 3.12347  | 0        |
|                                                  |      | -0.47045 | 0        | 2.75109  |
|                                                  | Pb4  | 2.56882  | 0        | 0.15219  |
|                                                  |      | 0        | 3.12347  | 0        |
|                                                  |      | 0.47045  | 0        | 2.75109  |
|                                                  | Pb5  | 2.79695  | 0        | -0.25707 |
|                                                  |      | 0        | 3.27619  | 0        |
|                                                  |      | -0.18067 | 0        | 2.98138  |
|                                                  | Pb6  | 2.79695  | 0        | 0.25707  |
|                                                  |      | 0        | 3.27619  | 0        |
|                                                  |      | 0.18067  | 0        | 2.98138  |

**Table S7.** The obtained Born effective charges of  $\text{Pb}_3\text{O}_2\text{Br}_2$ .

| Crystal                                              | atom | $q_{xx}$ | $q_{yy}$ | $q_{zz}$ |
|------------------------------------------------------|------|----------|----------|----------|
| <b><math>\text{Pb}_3\text{O}_2\text{Br}_2</math></b> | O1   | -2.14091 | -0.07709 | 0.24095  |
|                                                      |      | -0.4672  | -3.4366  | -0.13938 |
|                                                      |      | 0.42822  | 0.03023  | -2.39448 |
|                                                      | O2   | -2.14091 | 0.07709  | -0.24095 |
|                                                      |      | 0.4672   | -3.4366  | -0.13938 |
|                                                      |      | -0.42822 | 0.03023  | -2.39448 |
|                                                      | O3   | -2.14091 | -0.07709 | -0.24095 |
|                                                      |      | -0.4672  | -3.4366  | 0.13938  |
|                                                      |      | -0.42822 | -0.03023 | -2.39448 |
|                                                      | O4   | -2.14091 | 0.07709  | 0.24095  |
|                                                      |      | 0.4672   | -3.4366  | 0.13938  |
|                                                      |      | 0.42822  | -0.03023 | -2.39448 |
|                                                      | Br1  | -2.80378 | 0        | -0.00424 |
|                                                      |      | 0        | -1.62696 | 0        |
|                                                      |      | -0.10324 | 0        | -1.60854 |
|                                                      | Br2  | -2.80378 | 0        | 0.00424  |
|                                                      |      | 0        | -1.62696 | 0        |
|                                                      |      | 0.10324  | 0        | -1.60854 |
|                                                      | Br3  | -1.40402 | 0        | -0.15908 |
|                                                      |      | 0        | -1.79283 | 0        |
|                                                      |      | -0.30164 | 0        | -2.14664 |
|                                                      | Br4  | -1.40402 | 0        | 0.15908  |
|                                                      |      | 0        | -1.79283 | 0        |
|                                                      |      | 0.30164  | 0        | -2.14664 |
|                                                      | Pb1  | 2.8812   | 0        | -0.21835 |
|                                                      |      | 0        | 3.68426  | 0        |
|                                                      |      | -0.25242 | 0        | 2.50932  |
|                                                      | Pb2  | 2.8812   | 0        | 0.21835  |
|                                                      |      | 0        | 3.68426  | 0        |
|                                                      |      | 0.25242  | 0        | 2.50932  |
|                                                      | Pb3  | 2.50052  | 0        | -0.13904 |
|                                                      |      | 0        | 3.27389  | 0        |
|                                                      |      | -0.37698 | 0        | 3.00411  |
|                                                      | Pb4  | 2.50052  | 0        | 0.13904  |
|                                                      |      | 0        | 3.27389  | 0        |
|                                                      |      | 0.37698  | 0        | 3.00411  |
|                                                      | Pb5  | 3.10697  | 0        | -0.31639 |
|                                                      |      | 0        | 3.33485  | 0        |
|                                                      |      | -0.19102 | 0        | 3.03071  |
|                                                      | Pb6  | 3.10697  | 0        | 0.31639  |
|                                                      |      | 0        | 3.33485  | 0        |
|                                                      |      | 0.19102  | 0        | 3.03071  |

**Table S8.** The obtained Born effective charges of  $\text{Pb}_3\text{O}_2\text{I}_2$ .

| Crystal                                             | atom | $q_{xx}$ | $q_{yy}$ | $q_{zz}$ |
|-----------------------------------------------------|------|----------|----------|----------|
| <b><math>\text{Pb}_3\text{O}_2\text{I}_2</math></b> | O1   | -2.50878 | 0.29931  | 0.22778  |
|                                                     |      | 0.1664   | -3.6608  | -0.61266 |
|                                                     |      | 0.11855  | -0.23359 | -2.55461 |
|                                                     | O2   | -2.50878 | -0.29931 | -0.22778 |
|                                                     |      | -0.1664  | -3.6608  | -0.61266 |
|                                                     |      | -0.11855 | -0.23359 | -2.55461 |
|                                                     | O3   | -2.50878 | 0.29931  | -0.22778 |
|                                                     |      | 0.1664   | -3.6608  | 0.61266  |
|                                                     |      | -0.11855 | 0.23359  | -2.55461 |

|     |          |          |          |
|-----|----------|----------|----------|
| O4  | -2.50878 | -0.29931 | 0.22778  |
|     | -0.1664  | -3.6608  | 0.61266  |
|     | 0.11855  | 0.23359  | -2.55461 |
| I1  | -2.07598 | 0        | -1.04704 |
|     | 0        | -1.81465 | 0        |
|     | -0.86623 | 0        | -1385534 |
| I2  | -2.07598 | 0        | 1.04704  |
|     | 0        | -1.81465 | 0        |
|     | 0.86623  | 0        | -1385534 |
| I3  | -1.77951 | 0        | -0.37329 |
|     | 0        | -1.56772 | 0        |
|     | -0.17454 | 0        | -2.04128 |
| I4  | -1.77951 | 0        | 0.37329  |
|     | 0        | -1.56772 | 0        |
|     | 0.17454  | 0        | -2.04128 |
| I1  | 2.99927  | 0        | -0.41559 |
|     | 0        | 3.67755  | 0        |
|     | -0.18939 | 0        | 2.76695  |
| Pb2 | 2.99927  | 0        | 0.41559  |
|     | 0        | 3.67755  | 0        |
|     | 0.18939  | 0        | 2.76695  |
| Pb3 | 3.65701  | 0        | 0.17498  |
|     | 0        | 3.45576  | 0        |
|     | -0.04174 | 0        | 2.98908  |
| Pb4 | 3.65701  | 0        | -0.17498 |
|     | 0        | 3.45576  | 0        |
|     | 0.04174  | 0        | 2.98908  |
| Pb5 | 2.21677  | 0        | -0.22123 |
|     | 0        | 3.57065  | 0        |
|     | 0.10294  | 0        | 3.24982  |
| Pb6 | 2.21677  | 0        | 0.22123  |
|     | 0        | 3.57065  | 0        |
|     | -0.10294 | 0        | 3.24982  |

**Table S9.** The obtained diagonal elements and the difference of Born effective charges.

| Crystal                                          | atom | $q_{xx}$ | $q_{yy}$ | $q_{zz}$ | $\Delta q$ |
|--------------------------------------------------|------|----------|----------|----------|------------|
| <b>Pb<sub>3</sub>O<sub>2</sub>Cl<sub>2</sub></b> | Cl1  | -2.53999 | -1.61943 | -1.60150 | -0.0179    |
|                                                  | Cl2  | -1.49253 | -1.75796 | -2.03922 | 0.28126    |
|                                                  | Pb1  | 2.89843  | 3.54836  | 2.46643  | 1.08193    |
|                                                  | Pb2  | 2.56882  | 3.12347  | 2.75109  | 0.37238    |
|                                                  | Pb3  | 2.79695  | 3.27619  | 2.95138  | 0.29481    |
| <b>Pb<sub>3</sub>O<sub>2</sub>Br<sub>2</sub></b> | Br1  | -2.80378 | -1.62696 | -1.60854 | -1.19524   |
|                                                  | Br2  | -1.40402 | -1.79283 | -2.14664 | 0.74262    |
|                                                  | Pb1  | 2.88212  | 3.68426  | 2.50932  | 0.37280    |
|                                                  | Pb2  | 2.50052  | 3.27389  | 3.00411  | -0.50359   |
|                                                  | Pb3  | 3.10697  | 3.33485  | 3.03071  | 0.07626    |
| <b>Pb<sub>3</sub>O<sub>2</sub>I<sub>2</sub></b>  | I1   | -2.07598 | -1.81465 | -1.85534 | 0.04069    |
|                                                  | I2   | -1.77951 | -1.56772 | -2.04128 | 0.47356    |
|                                                  | Pb1  | 2.99927  | 3.67755  | 2.76695  | 0.91060    |
|                                                  | Pb2  | 3.65701  | 3.45576  | 2.98908  | 0.46668    |
|                                                  | Pb3  | 2.21677  | 3.57065  | 3.24982  | 0.32083    |

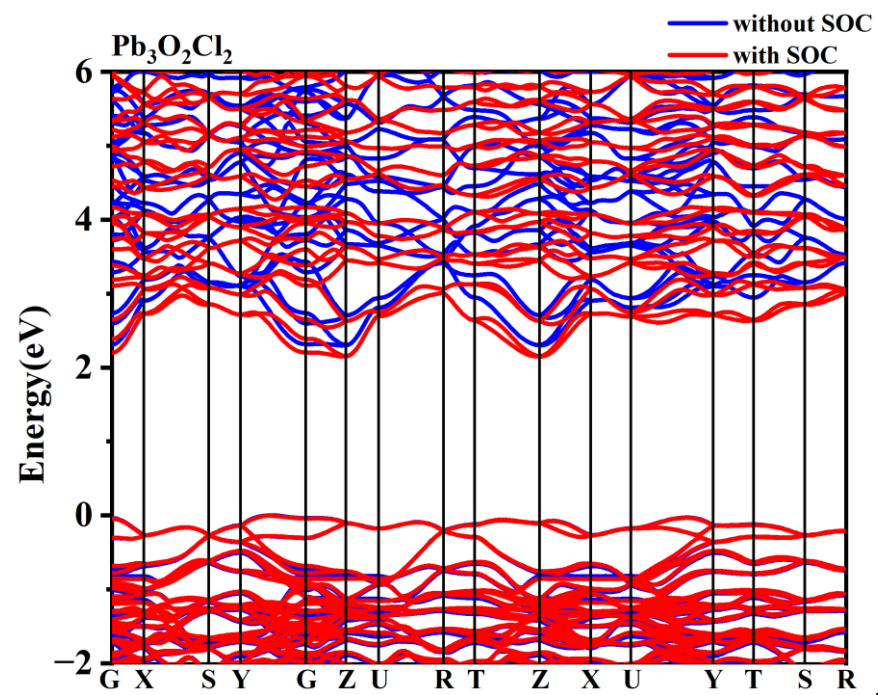

**Figure S1.** The obtained band structures with and without concerning SOC.
